# Supplementary material for: A targeted hydrodynamic gold nanorod delivery system based on gigahertz acoustic streaming
Source: Royal Society of Chemistry journal article supplement (doi:10.1039/d2nr03222h), 2022-01-01
Supplement: d2nr03222h1.pdf [file d2nr03222h1.pdf]

# Supplementary Information

## Targeted Hydrodynamic Gold Nanorods Delivery System based on Gigahertz

### Acoustic Streaming

Shan He<sup>a</sup>, Wei Pang<sup>a</sup>, Xiaoyu Wu<sup>a</sup>, Yang Yang<sup>a</sup>, Wenjun Li<sup>a</sup>, Hang Qi<sup>a</sup>, Chongling Sun<sup>a</sup>, Xuexin Duan<sup>a</sup> and Yanyan Wang<sup>a\*</sup>

<sup>a</sup>.State Key Laboratory of Precision Measuring Technology and Instruments, College of Precision Instruments and Opto-electronics Engineering, Tianjin University, Tianjin 300072, China

Corresponding author: [yanyanwang@tju.edu.cn](mailto:yanyanwang@tju.edu.cn)

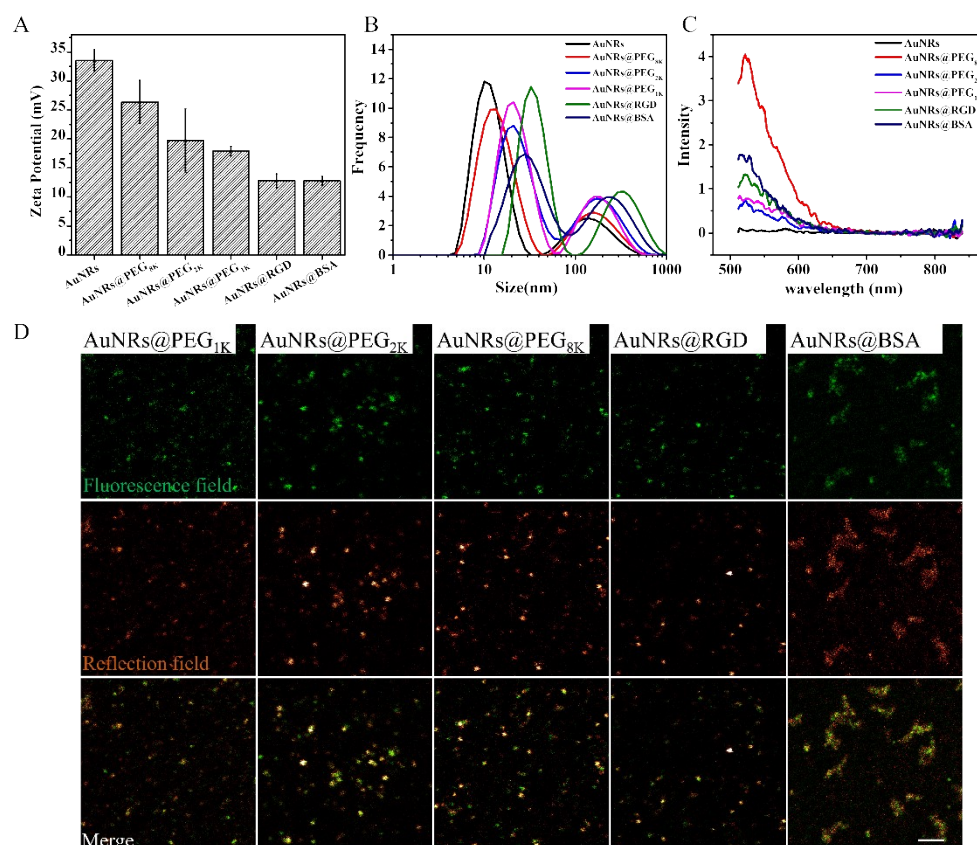

Figure S1 A. Zeta potential of AuNRs with five different modification. B. Quantitative analysis of size measured by dynamic light scattering (DLS) of AuNRs with different molecule modification. C. The fluorescence intensity of AuNRs with different modification. D. The images of AuNRs with different modification in both fluorescence field and reflection field in the same area of the view. Scale bar = 2  $\mu$ m

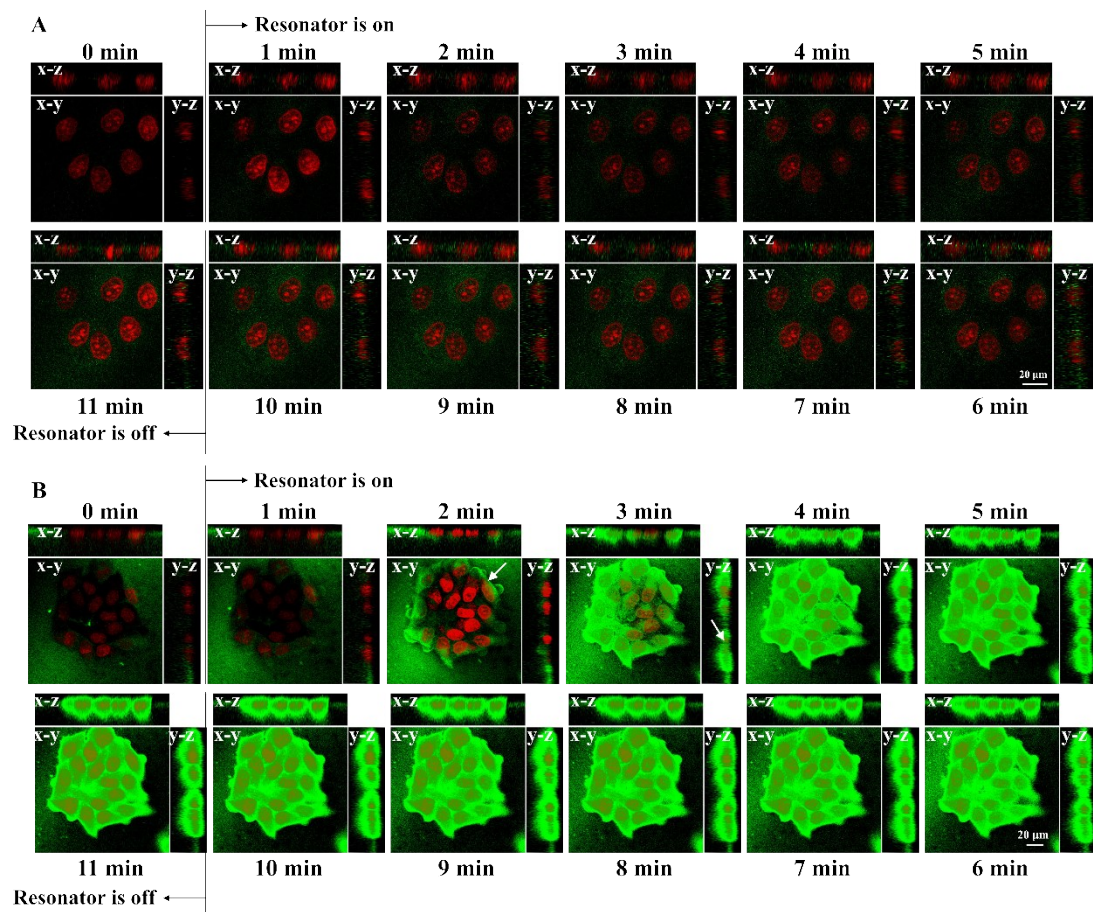

Figure S2 The cellular delivery of AuNRs@PEG<sub>1K</sub> (A) and AuNRs@RGD (B) at different times with AS stimulation.

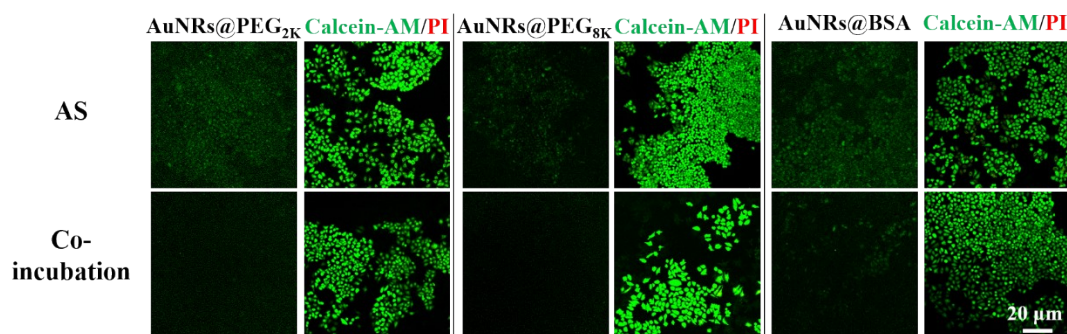

Figure S3 Cell viability test after AuNRs intracellular delivery via AS and co-incubation method. Calcein-AM (green) represents living cells and PI (red) represents dead cells.



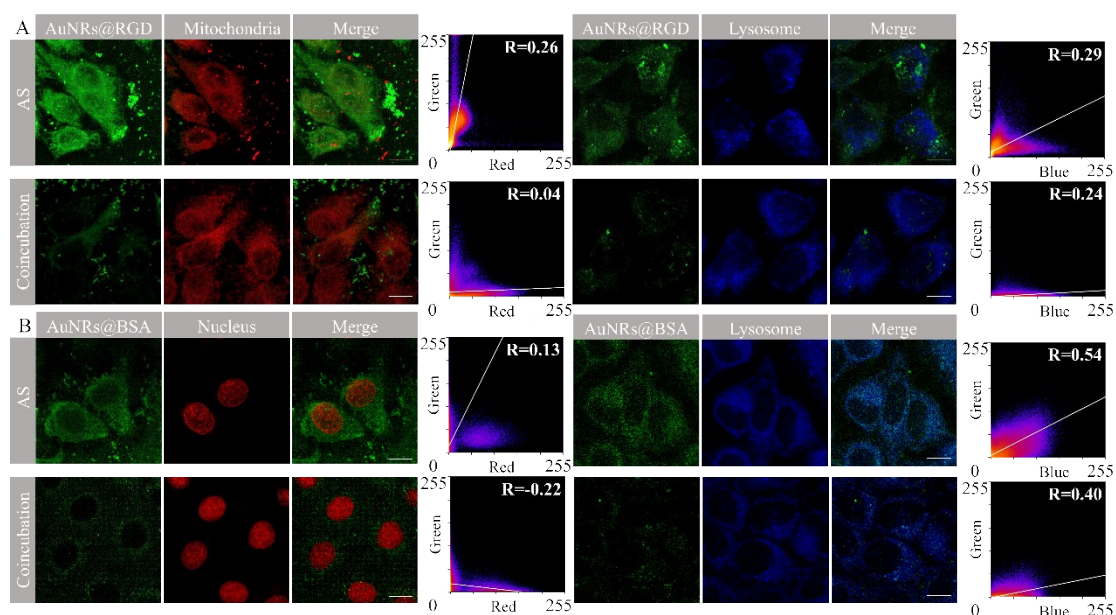

Figure S4 CLSM images and the Pearson's correlation coefficient for intracellular tracking after AuNRs@RGD (A) and AuNRs@BSA (B) delivered with AS and coincubation method. Scale bar = 10  $\mu\text{m}$

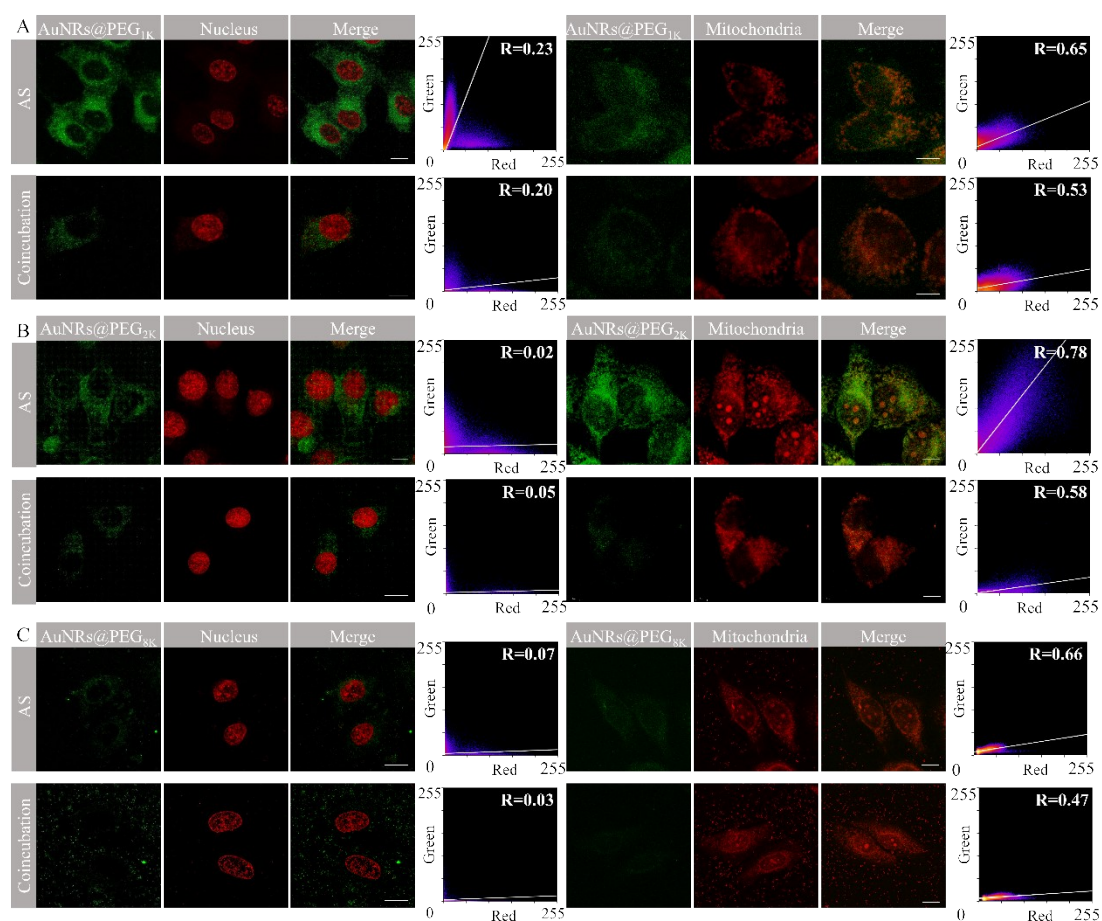

Figure S5 CLSM images and the Pearson's correlation coefficient for intracellular tracking after (A) AuNRs@PEG<sub>1K</sub>, (B) AuNRs@PEG<sub>2K</sub> and (C) AuNRs@PEG<sub>8K</sub> delivered with AS and coincubation method. Scale bar = 10  $\mu\text{m}$

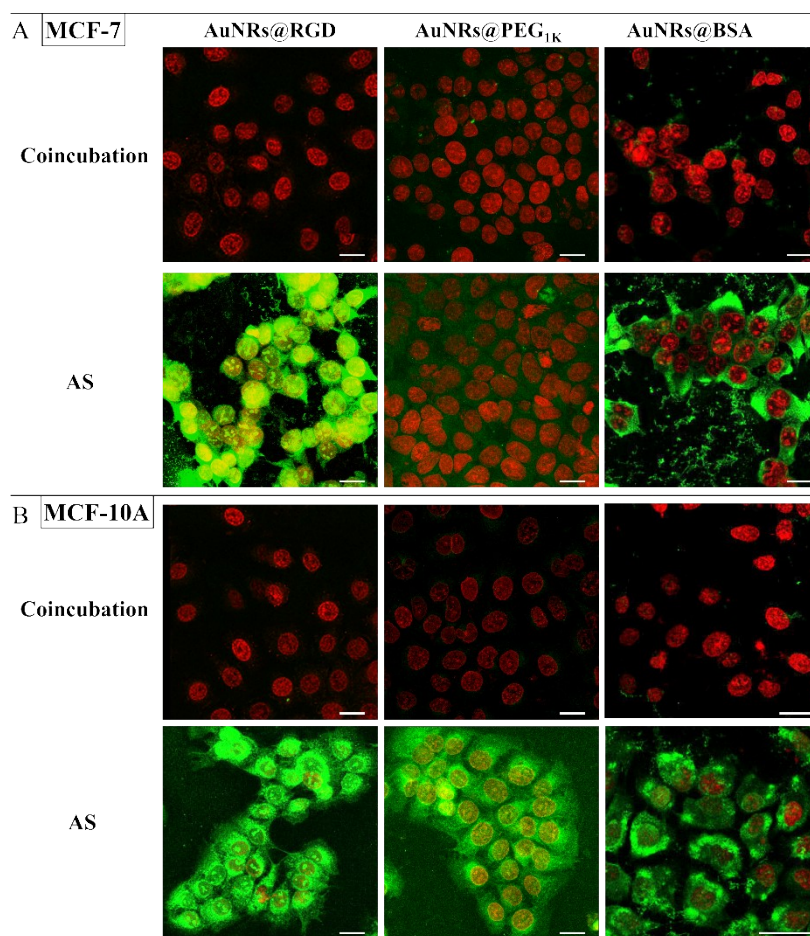

Figure S6 A. AuNRs@RGD, AuNRs@PEG<sub>1K</sub> and AuNRs@BSA intracellular delivery of MCF-7 cells induced by AS and co-incubation. B. AuNRs@RGD, AuNRs@PEG<sub>1K</sub> and AuNRs@BSA intracellular delivery of MCF-10A cells induced by AS and co-incubation. Scale bar = 20  $\mu$ m

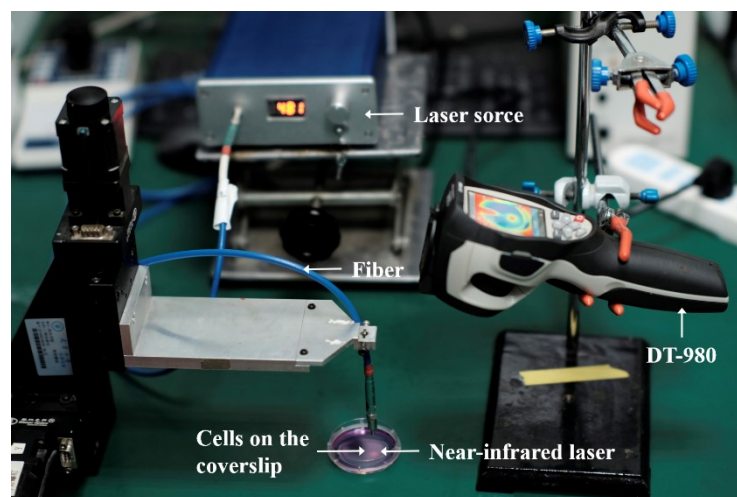

Figure S7 Cells with AuNRs were irradiated with 500 mW near-infrared laser of 785 nm, and the temperature was recorded with DT-980.

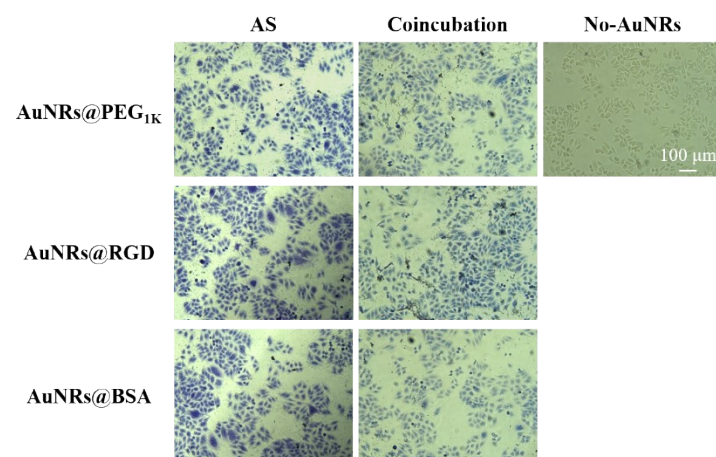

Figure S8 The characterization of cell viability after photothermal therapy via trypan blue.
